# Supplementary material for: Local Administration of GITR Agonistic Antibody Induces a Stronger Antitumor Immunity than Systemic Delivery
Source: PubMed Central journal article supplement (PMC6447616; doi:10.1038/s41598-019-41724-x), 2019-04-03
Supplement: 41598_2019_41724_MOESM1_ESM.pdf [file 41598_2019_41724_MOESM1_ESM.pdf]

# **Local Administration of GITR Agonistic Antibody Induces a Stronger Antitumor Immunity than Systemic Delivery**

Kenta Narumi<sup>1</sup>, Reina Miyakawa<sup>1</sup>, Chihiro Shibasaki<sup>1</sup>, Marina Henmi<sup>1</sup>, Yukihiro Mizoguchi<sup>1</sup>, Ryosuke Ueda<sup>1</sup>, Hisayoshi Hashimoto<sup>1</sup>, Nobuyoshi Hiraoka<sup>2</sup>, Teruhiko Yoshida<sup>3</sup>, Kazunori Aoki<sup>1\*</sup>

<sup>1</sup>Division of Molecular and Cellular Medicine, <sup>2</sup>Division of Molecular Pathology, <sup>3</sup>Division of Genetics, National Cancer Center Research Institute, 5-1-1 Tsukiji, Chuo-ku, Tokyo 104-0045, Japan

Correspondence: Kazunori Aoki, Division of Molecular and Cellular Medicine, National Cancer Center Research Institute  
5-1-1 Tsukiji, Chuo-ku, Tokyo 104-0045, Japan  
Tel: +81-3-3542-2511, Fax: +81-3-3248-1648  
E-mail: [kaoki@ncc.go.jp](mailto:kaoki@ncc.go.jp)

# Supplemental figure S1

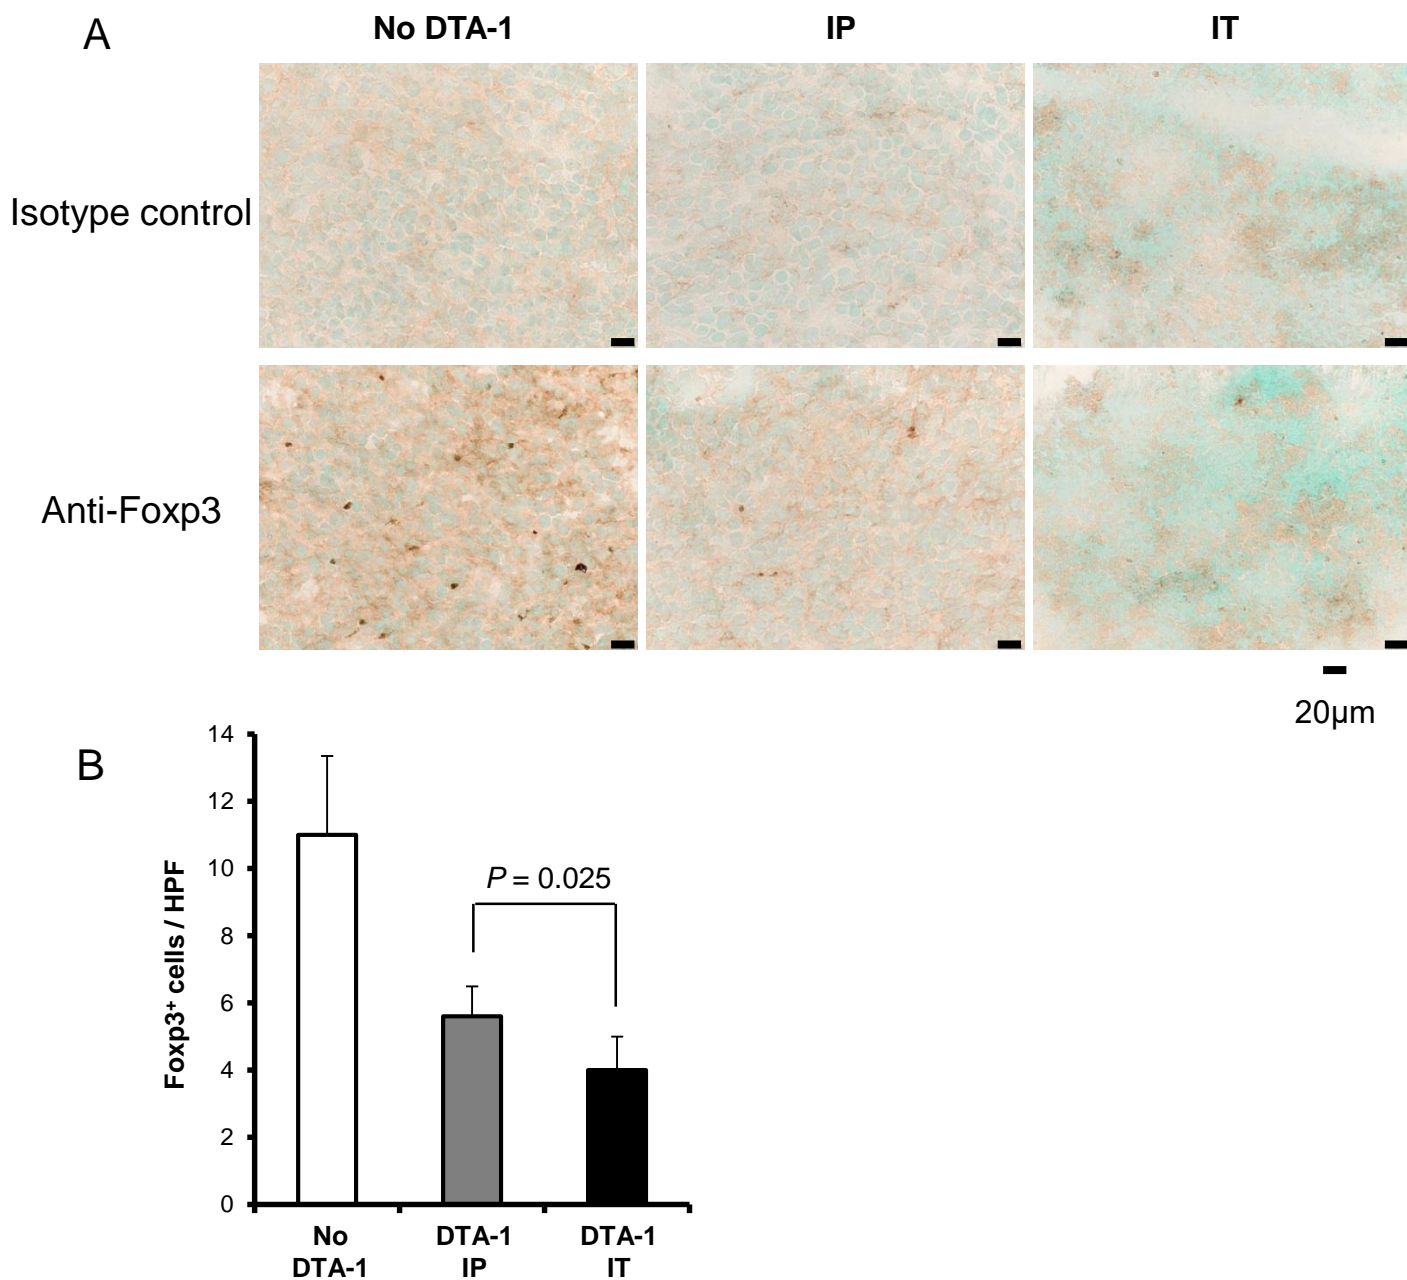

## Figure S1. Infiltration of Tregs into the DTA-1-treated tumors.

(A) Tumors were harvested 5 days after Ab treatment, the fresh frozen sections of subcutaneous tumors were processed for immunohistochemistry with anti-Foxp3 antibody (BD Biosciences). Parallel negative controls with an antibody of the same isotype were examined in all cases. The sections were counter-stained with methylgreen. (B) Number of Foxp3+ cells in CT26 tumors. Positive cells were counted in 5 representative high power view fields under microscope.

# Supplemental figure S2

50 $\mu$ m 20 $\mu$ m

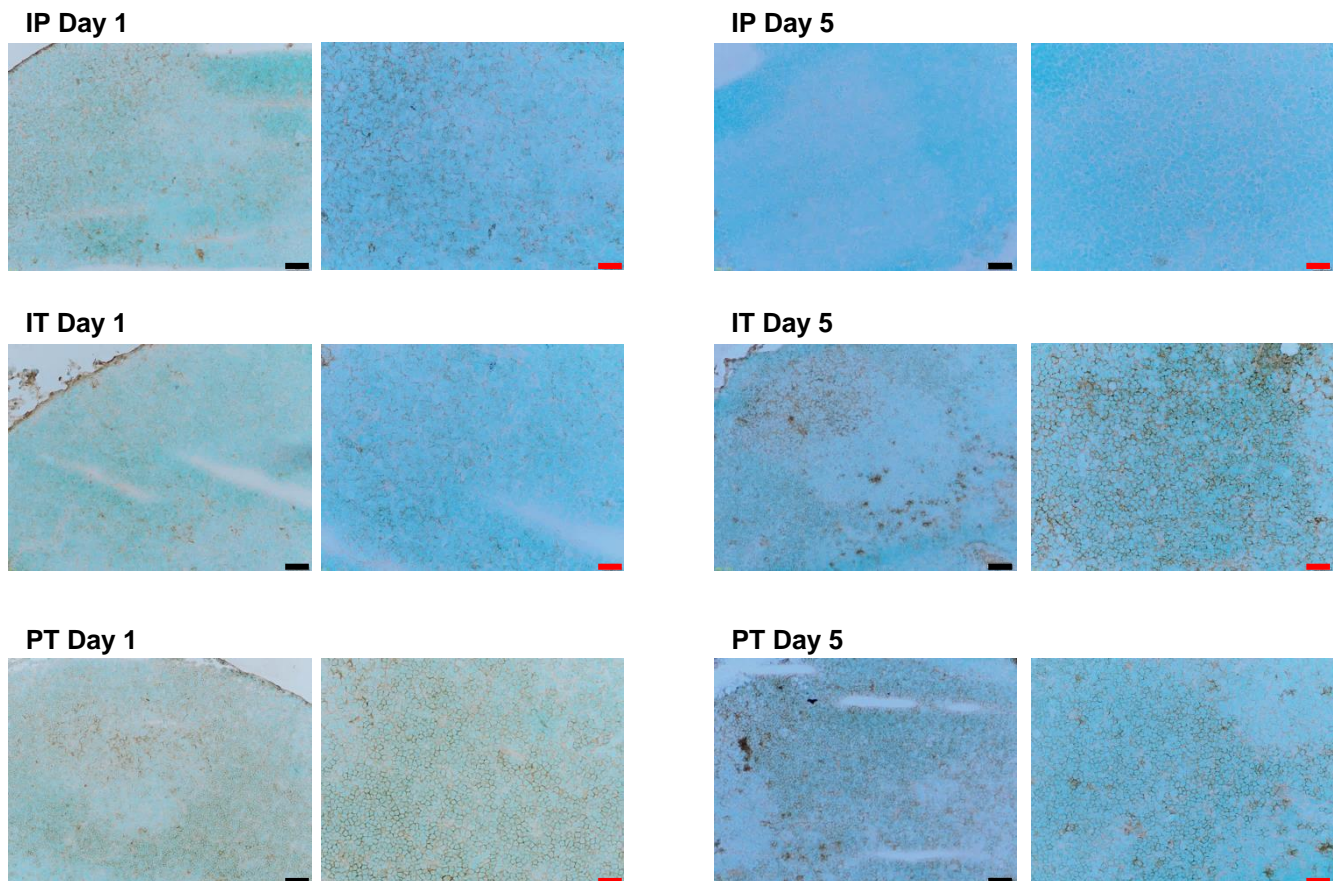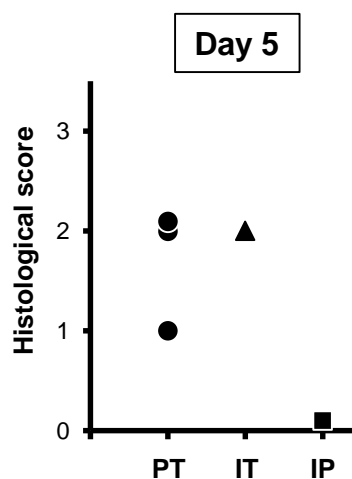

**Figure S2. Peritumorally injected DTA-1 Ab was also detected in the TDLNs on day 5 after the injection.**

Immunohistochemical staining of TDLNs for rat IgG (DTA-1) was performed sequentially 1, 3 and 5 days after DTA-1 Ab injection. Immunohistological scoring criteria are defined in Materials and Methods. The sections were counterstained with methylgreen.
